# 1 The carbon footprint of bioinformatics

2

3 Jason Grealey<sup>1,2,^</sup>, Loïc Lanelongue<sup>3,4,5,^</sup>, Woei-Yuh Saw<sup>1</sup>, Jonathan Marten<sup>4,#</sup>, Guillaume  
4 Meric<sup>1,6</sup>, Sergio Ruiz-Carmona<sup>1</sup>, Michael Inouye<sup>1,3,4,5,7,8,9,\*</sup>

5

6 <sup>1</sup>Cambridge Baker Systems Genomics Initiative, Baker Heart and Diabetes Institute, Melbourne, Victoria,  
7 Australia

8 <sup>2</sup>Department of Mathematics and Statistics, La Trobe University, Melbourne, Australia

9 <sup>3</sup>Cambridge Baker Systems Genomics Initiative, Department of Public Health and Primary Care, University of  
10 Cambridge, Cambridge, UK

11 <sup>4</sup>British Heart Foundation Cardiovascular Epidemiology Unit, Department of Public Health and Primary Care,  
12 University of Cambridge, Cambridge, UK

13 <sup>5</sup>Health Data Research UK Cambridge, Wellcome Genome Campus and University of Cambridge, Cambridge,  
14 UK

15 <sup>6</sup>Department of Infectious Diseases, Central Clinical School, Monash University, Melbourne Australia

16 <sup>7</sup>British Heart Foundation Centre of Research Excellence, University of Cambridge, Cambridge, UK

17 <sup>8</sup>National Institute for Health Research Cambridge Biomedical Research Centre, University of Cambridge and  
18 Cambridge University Hospitals, Cambridge, UK

19 <sup>9</sup>The Alan Turing Institute, London, UK

20

21 ^ Joint first authors

22 \* Correspondence: MI ([mi336@medschl.cam.ac.uk](mailto:mi336@medschl.cam.ac.uk); [minouye@baker.edu.au](mailto:minouye@baker.edu.au))

23 # Current address: Genomics PLC

24

25 Keywords: carbon footprint, bioinformatics, genomics, green algorithms.

## 26 Abstract

27 Bioinformatic research relies on large-scale computational infrastructures which have a non-  
28 zero carbon footprint. So far, no study has quantified the environmental costs of  
29 bioinformatic tools and commonly run analyses. In this study, we estimate the bioinformatic  
30 carbon footprint (in kilograms of CO<sub>2</sub> equivalent units, kgCO<sub>2</sub>e) using the freely available  
31 Green Algorithms calculator ([www.green-algorithms.org](http://www.green-algorithms.org)). We assess (i) bioinformatic  
32 approaches in genome-wide association studies (GWAS), RNA sequencing, genome  
33 assembly, metagenomics, phylogenetics and molecular simulations, as well as (ii)  
34 computation strategies, such as parallelisation, CPU (central processing unit) vs GPU  
35 (graphics processing unit), cloud vs. local computing infrastructure and geography. In  
36 particular, for GWAS, we found that biobank-scale analyses emitted substantial kgCO<sub>2</sub>e and  
37 simple software upgrades could make GWAS greener, e.g. upgrading from BOLT-LMM v1 to  
38 v2.3 reduced carbon footprint by 73%. Switching from the average data centre to a more  
39 efficient data centres can reduce carbon footprint by ~34%. Memory over-allocation can be a  
40 substantial contributor to an algorithm's carbon footprint. The use of faster processors or  
41 greater parallelisation reduces run time but can lead to, sometimes substantially, greater  
42 carbon footprint. Finally, we provide guidance on how researchers can reduce power  
43 consumption and minimise kgCO<sub>2</sub>e. Overall, this work elucidates the carbon footprint of  
44 common analyses in bioinformatics and provides solutions which empower a move toward  
45 greener research.

## 46 Introduction

47 Biological and biomedical research now requires the analysis of large and complex datasets,  
48 which wouldn't be possible without the use of large-scale computational resources. Whilst  
49 bioinformatic research has enabled major advances in the understanding of a myriad of  
50 diseases such as cancer [1]–[3] and COVID-19 [4], the costs of the associated computing  
51 requirements are not limited to the financial; the energy usage of computers causes  
52 greenhouse gas (GHG) emissions which themselves have a detrimental impact on human  
53 health.

54

55 Energy production affects both human and planetary health. The yearly electricity usage of  
56 data centres and high performance computing (HPC) facilities (200 TWh [5]) already  
57 exceeds the consumption of countries such as Ireland or Denmark [6] and is predicted to  
58 continue to rise over the next decade [5], [7]. Power generation, through the associated  
59 emissions of GHGs, is one of the main causes of both outdoor air pollution and climate  
60 change. Every year, it is estimated that 4.2 million deaths are caused by ambient air  
61 pollution alone while 91% of the world's population suffers from air quality below the World  
62 Health Organisation standards [8]. Global warming results in further consequences on  
63 human health, economy and society: the daily population exposure to wildfires has  
64 increased in 77% of countries [9], 133.6 billion potential work hours were lost to high  
65 temperatures in 2018 and with 220 million heatwave exposures, vulnerable populations  
66 (aged 65 and older) are affected at an unprecedented level.

67

68 The growth of large biological databases, such as UK Biobank [10], All of Us Initiative [11],  
69 and Our Future Health [12], has substantially increased the need for computational  
70 resources to analyse these data and will continue to do so. With climate change an urgent  
71 global emergency, it is important to assess the carbon footprint of these analyses and their  
72 requisite computational tools so that environmental impacts can be minimised.

73

74 In this study, we estimate the carbon footprint of common bioinformatic tools using a model  
75 which accounts for the energy use of different hardware components and the emissions  
76 associated with electricity production. For each analysis, we contextualise the carbon  
77 footprint in multiple ways, such as distances travelled by car or with regards to carbon  
78 sequestration by trees. This study raises awareness, provides easy-to-use metrics, and  
79 makes recommendations for greener bioinformatics.

## 80 Results

81 We estimated the carbon footprint of a variety of bioinformatic tools and analyses (**Table 1**,  
82 **Table 2**) using the Green Algorithms model and online tool (**Methods**). For each software,  
83 we utilised benchmarks of running time and computational resources; in the rare cases  
84 where published benchmarks were unavailable, we used in-house analyses to estimate  
85 resource usage (**Methods**). The estimations are based on the global average data centre  
86 efficiency (PUE) of 1.67 [13], the global average carbon intensity (0.475 kgCO<sub>2</sub>e/kWh [14])  
87 and a usage factor of 1 (**Methods**).

88

89 We considered a wide range of bioinformatic analyses: genome assembly, metagenomics,  
90 phylogenetics, RNA sequencing, genome-wide association analysis, molecular simulations  
91 and virtual screening. Detailed results are provided for each analysis below. Furthermore,  
92 we show that choices of hardware and software versions substantially affect the carbon  
93 footprint of a given analysis, in particular cloud vs. local computing platforms, memory  
94 usage, processor options, and parallel computing. These results provide, for each task,  
95 reference values of carbon footprints for researchers; however, we note how the estimations  
96 are likely to scale with different parameters (e.g. sample size or number of features) and  
97 ultimately would advise researchers to utilise the GA tool ([www.green-algorithms.org](http://www.green-algorithms.org)).

## 98 Genome assembly

99 Genome assembly is the process by which sequencing reads (short or long reads, or a  
100 combination) are combined to arrive at a single or set consensus sequences for an  
101 organism. Hunt et al. [15] compared SSPACE [16], SGA [17] and SOAPdenovo2 [18] for  
102 genome scaffolding using contigs produced with the Velvet assembler [19] and the human  
103 chromosome 14 GAGE dataset [20]; two read sets were compared, one using 22.7 million  
104 short reads (fragment length of 3 kb) and the other 2.4 million long reads (35 kb).  
105 Scaffolding the short reads resulted in 0.13, 0.0036, and 0.0027 kgCO<sub>2</sub>e when using SGA,  
106 SOAPdenovo2 and SSPACE, respectively (**Table 2**), which is equivalent to 0.14, 0.0039 and  
107 0.0029 tree-months. For long reads scaffolding, the corresponding carbon footprints were  
108 lower, 0.029, 0.0015 and 0.0010 kgCO<sub>2</sub>e (0.032 to 0.0011 tree-months). As the running time  
109 of a number of genome assembly tools scale linearly with the number of reads [21], these  
110 results equate to between 0.0001 to 0.006 kgCO<sub>2</sub>e (0.0001 to 0.006 tree-months) per million  
111 short reads assembled and 0.0004 to 0.0122 kgCO<sub>2</sub>e (0.0005 to 0.0133 tree-months) per  
112 million long reads assembled. On average, long read assembly had a carbon footprint 3.2x  
113 larger than short-read assembly for the tools we measured. All three methods had similar  
114 performance on these read sets with SOAPdenovo2 slightly outperforming SGA and  
115 SSPACE.

116  
117 For whole genome assembly of humans, the well-established softwares Abyss [22] and  
118 MEGAHIT [23] were benchmarked by Jackman et al. [22] using Illumina short read  
119 sequencing (815M reads, 379M uniquely mapped reads, 6kbp mean insert size) (**Table 2**).  
120 We estimated that this task emits 10.7 kgCO<sub>2</sub>e using Abyss and 15.1 kgCO<sub>2</sub>e using  
121 MEGAHIT (equivalent to 12 and 16 tree-months) and per million reads, 0.013 kgCO<sub>2</sub>e  
122 (Abyss2.0, 0.014 tree-months) and 0.019 kgCO<sub>2</sub>e (MEGAHIT, 0.020 tree-months) .

## 123 Metagenomics

124 Metagenomics is the sequencing and analysis of all genetic material in a sample. Based on  
125 a benchmark from Vollmers et al. [24], we estimated the carbon footprint of metagenome  
126 assembly with three commonly used assemblers, metaSPAdes [25], MEGAHIT [23] and  
127 MetaVelvet (k-mer length 101bp) [26] on 100 samples from forest soil (33M reads, median  
128 length 360 bp). We found carbon footprints ranged between 14 and 186 kgCO<sub>2</sub>e (16 and  
129 203 tree-months), corresponding to 0.14 to 1.9 kgCO<sub>2</sub>e (0.2 to 2 tree-months) per sample.  
130 Meta-SPAdes had the greatest carbon footprint but also the best performance followed by  
131 MetaVelvet and MEGAHIT, respectively (**Table 2**).

132

133 For metagenomic classifiers, Dilthey et al. [27] benchmarked MetaMaps [27], Kraken2 [28],  
134 Kraken/Bracken [29], [30], and Centrifuge [31]. They compared these tools on ~5Gb of  
135 randomly sampled reads from an Oxford Nanopore GridION sequencing run from Zymo  
136 mock communities, which comprises five Gram-positive bacteria, three Gram-negative  
137 bacteria and two types of yeast. Carbon footprints differed by several orders of magnitude,  
138 MetaMaps had the largest footprint with 18.25 kgCO<sub>2</sub>e (19.9 tree-months), followed by  
139 Kraken/Bracken 0.092 kgCO<sub>2</sub>e (0.1 tree-months), Centrifuge 0.013 kgCO<sub>2</sub>e (0.014 tree-  
140 months) and Kraken2 0.0052 kgCO<sub>2</sub>e (0.0057 tree-months) (**Table 2**). The carbon footprints  
141 of metagenomic classification ranged from 0.001 to 0.018 kgCO<sub>2</sub>e (0.001 to 0.02 tree-  
142 months) per Gb of classified reads using short read classifiers (Kraken2, Centrifuge,  
143 Kraken/Bracken). Kraken2 had the highest performance over all taxonomic ranks when all  
144 reads were assembled, followed by Kraken/Bracken, Centrifuge and MetaMaps. However,  
145 when considering reads >1000bp, MetaMaps had the highest precision and recall for all  
146 available taxonomic levels, followed by Kraken2, Kraken/Bracken, and Centrifuge.

## 147 Phylogenetics

148 Phylogenetics is the use of genetic information to analyse the evolutionary history and  
149 relationships amongst individuals or groups. Baele et al. [32] benchmarked nucleotide-based  
150 phylogenetic analyses with and without spatial location information to study the evolution of  
151 the Ebola virus during the 2013-2016 West African epidemics (1,610 genomes, 18,992  
152 nucleotides [33]). The authors also investigated more complex codon models. For all these  
153 tasks, they utilised BEAST combined with BEAGLE [34].

154

155 We estimated the carbon footprint of nucleotide-based modelling of the Ebola virus dataset  
156 was between 0.01 to 0.08 kgCO<sub>2</sub>e depending on hardware choices (0.013 to 0.083 tree-  
157 months) without modelling spatial information and 0.07 to 0.3 kgCO<sub>2</sub>e (0.077 to 0.33 tree-  
158 months) when including it. More complex codon modelling of extant carnivores and  
159 pangolins resulted in a greater footprint, from 0.02 to 0.1 kgCO<sub>2</sub>e (0.02 to 0.1 tree-months)  
160 (**Figure 2, Supplementary table 2**). These results illustrate a trade-off between running time  
161 and carbon footprints, and we discuss it in more detail below (**Parallelisation, Processors**).  
162 It should be noted that the running time of BEAST, and therefore its carbon footprint, scales  
163 as a power law, that is, non-linearly with the number of loci [35].

## 164 RNA sequencing

165 RNA sequencing (RNAseq) is the sequencing and analysis of all RNA in a sample. We first  
166 assessed the read alignment step in RNAseq using an extensive benchmarking by Baruzzo  
167 et al. [36]. We estimated the carbon footprint of aligning 10 million simulated 100-base read  
168 pairs to two different genomes, *Homo Sapiens* (hg19) and *Plasmodium falciparum* [36],  
169 which have substantially differing levels of complexity (*P. falciparum* with higher rates of  
170 polymorphisms and errors). The three most-cited software tested, STAR [37], HISAT2 [38]  
171 and TopHat2 [39], all had low recall on the malaria dataset, so we also assessed Novoalign  
172 [40] as it performed significantly better for this task (**Table 2**). Despite its greater  
173 performance for *P. falciparum*, Novoalign had the highest carbon footprint (0.67 kgCO<sub>2</sub>e,  
174 0.73 tree-months) followed by STAR (0.37 kgCO<sub>2</sub>e, 0.40 tree-months), TopHat2 (0.24

175 kgCO<sub>2</sub>e, 0.26 tree-months) and HISAT2 with the lowest (0.0052 kgCO<sub>2</sub>e, 0.0057 tree-  
176 months). For human read alignment, all four methods had high recall. HISAT2 had, again,  
177 the lowest carbon footprint with 0.0054 kgCO<sub>2</sub>e (0.0059 tree-months) followed by STAR with  
178 0.0097 kgCO<sub>2</sub>e (0.011 tree-months), TopHat2 with 0.32 kgCO<sub>2</sub>e (0.35 tree-months) and  
179 Novoalign with 0.98 kgCO<sub>2</sub>e (1.1 tree-months). As alignment tools are often reported with  
180 alignment speed (reads aligned in a given time) [37], [38], the carbon footprints of the  
181 analyses above scale accordingly and ranged from 0.001 to 0.1 kgCO<sub>2</sub>e (0.001 to 0.1 tree-  
182 months) per million human or *P. falciparum* reads.

183

184 To quantify the carbon footprint of a full quality control pipeline with FastQC, we utilised 392  
185 RNAseq read sets obtained from PBMC samples [41], [42], with a median depth of 45 million  
186 paired-end reads and average length 146bp. Adapters were trimmed with TrimGalore [43],  
187 followed by the removal of optical duplicates using bbmap/clumpify [44]. Reads were then  
188 aligned to the human genome reference (Ensemble GRCh 38.98) using STAR [37]. We  
189 estimated the carbon footprint of this pipeline to be 55 kgCO<sub>2</sub>e (60 tree-months) for the full  
190 dataset, or 1.2 kgCO<sub>2</sub>e (1.3 tree-months) per million reads (**Table 2**), which scales linearly  
191 (**Additional file 2**).

192

193 For transcript isoform abundance estimation, we could assess Sailfish [45], RSEM [46], and  
194 Cufflinks [47] using the benchmark from Kanitz et al. [48] on simulated human RNA-seq data  
195 (hg19). The Flux Simulator software [49] and GENCODE [50] were used to generate 100  
196 million single-end 50bp reads. The carbon footprints of this task were between 0.0081 and  
197 1.4 kgCO<sub>2</sub>e (0.009 to 1.5 tree-months). Sailfish had the lowest footprint, followed by  
198 Cufflinks and RSEM. (**Table 2**). Kanitz et al. showed that the time complexity for most of the  
199 tools tested was approximately linear, i.e. the carbon footprint is proportional to the number  
200 of reads. Additionally, these tools offer the option of parallelisation. However, for example,  
201 the decrease in running time when using 16 cores instead of one was not sufficient to offset  
202 the increase in power consumption, which resulted in a 2- to 6-fold increase in carbon  
203 footprint when utilising 16 cores (**Table 2**). RSEM and Sailfish had similar performance in  
204 this benchmark, but Sailfish's carbon footprint was 71-fold less than RSEM's when using 1  
205 core and 39-fold less with 16 cores. This difference in carbon footprint was partly due to  
206 Sailfish not performing a read alignment step. Lastly, whilst Cufflinks is largely used for  
207 abundance estimation, its main purpose is transcript isoform assembly, resulting in a  
208 significantly lower accuracy here (at a higher carbon cost).

## 209 Genome-wide association analysis

210 Genome-wide association analysis aims to identify genetic variants across the genome  
211 associated with a phenotype(s). Here, we assessed both genome-wide association studies  
212 (GWAS) and expression qualitative trait locus (eQTL) mapping in *cis*. We estimated the  
213 carbon footprint of GWAS with two different versions of Bolt-LMM [51] on the UK Biobank  
214 [10] (500k individuals, 93M imputed SNPs). We found that a single trait GWAS would emit  
215 17.3 kgCO<sub>2</sub>e (18.9 tree-months) with Bolt-LMM v1 and 4.7 kgCO<sub>2</sub>e (5.1 tree-months) with  
216 Bolt-LMM v2.3 (**Table 2**), a reduction of 73%. GWAS typically assess multiple phenotypes,  
217 e.g. metabolomics GWAS consider several hundred to thousands of metabolites; since the  
218 association models in GWAS are typically fit on a per-trait basis, the carbon footprint is  
219 proportional to the number of traits analysed. Bolt-LMM's carbon footprint also scales linearly

220 with the number of genetic variants [52], meaning that biobank-scale GWAS using UK  
221 Biobank (500k individuals) has a carbon footprint of 0.05 kgCO<sub>2</sub>e per million variants (0.06  
222 tree-months) with Bolt-LMM v2.3 and 0.2 kgCO<sub>2</sub>e per million variants (0.2 tree-months) with  
223 Bolt-LMM v1. However, Bolt-LMM doesn't scale linearly with the number of samples ( $time \sim$   
224  $O(N^{1.5})$  [52]), which must be taken into account when scaling the values to a different sample  
225 size.

226  
227 For cis-eQTL mapping, we compared the carbon footprint using either CPUs or GPUs on  
228 two example datasets, first on a small scale using skeletal muscle data from GTEx [53] (1  
229 gene, 700 individuals) with a benchmark of FastQTL (CPU) [54] and TensorQTL (GPU) [55],  
230 [56] from Taylor-Weiner et al. [56]. Secondly, we used an in-house assessment (**Methods**),  
231 to estimate the carbon footprint of a CPU-based analysis with LIMIX [57] to GPU-based  
232 TensorQTL using a larger cohort of 2,745 individuals with 18k genetic features and 10.7m  
233 SNPs (**Table 2**). In both cases, footprints were lower using GPUs instead of CPUs. The  
234 carbon footprint for the smaller scale GTEx benchmark was 28 times smaller when utilising  
235 the GPU instead of the CPU method: 0.0002 kgCO<sub>2</sub>e (0.0002 tree-months) with FastQTL,  
236 0.00001 kgCO<sub>2</sub>e (0.00001 tree-months) with TensorQTL. Similarly, for the cohort scale cis-  
237 eQTL mapping, the carbon footprints were 94 times smaller when utilising the GPU  
238 approach: 191 kgCO<sub>2</sub>e (208 tree-months) with LIMIX and 2 kgCO<sub>2</sub>e (2 tree-months) with  
239 TensorQTL. The scaling of eQTLs is complex, and the carbon footprint doesn't scale linearly  
240 with the number of traits or sample size [56], [57].

## 241 Molecular simulations and virtual screening

242 Molecular simulations and virtual screening are the use of computational simulation to model  
243 and understand molecular behaviour and the *in silico* scanning of small molecules for the  
244 purposes of drug discovery. We estimated the carbon footprint of simulating molecular  
245 dynamics with the Satellite Tobacco Mosaic Virus (1,066,628 atoms) for 100ns [58], [59] to  
246 be 17.8 kgCO<sub>2</sub>e (19 tree-months) using AMBER [60] and 95 kgCO<sub>2</sub>e (104 tree-months)  
247 using NAMD [61] (**Table 2**). This corresponds to 1 kgCO<sub>2</sub>e per ns (1 tree-month) when  
248 utilising NAMD and 0.2 kgCO<sub>2</sub>e per ns (0.2 tree-months) with AMBER. There are small  
249 discrepancies between the simulation parameters used by the tools (**Table 1**) so they can't  
250 be compared directly. Furthermore, due to a lack of information, neither of these estimations  
251 include the power usage from memory.

252  
253 Using a benchmark from Ruiz-Carmona et al. [62], we estimated the carbon footprint of three  
254 molecular docking methods, AutoDock Vina, Glide and rDock [62]–[64]. The data are based  
255 on the directory of useful decoys (DUD) benchmark set [65]. This study tested the three  
256 docking methods on four DUD systems ADA, COMT, PARP, and Trypsin. Where we used  
257 the average computational running time on these four DUD systems to estimate the carbon  
258 footprint of a 1 million ligand campaign. Glide, the fastest but not freely available tool had the  
259 smallest carbon footprint with 13 kgCO<sub>2</sub>e (14 tree-months), whilst rDock, which is freely  
260 available, had a footprint of 154 kgCO<sub>2</sub>e (168 tree-months), and AutoDock Vina (also freely  
261 available) had the largest impact with 514 kgCO<sub>2</sub>e (561 tree-months) (**Table 2**). rDock was  
262 the lowest carbon emitting method that was freely available and had comparable  
263 performance to Glide [62].

## 264 Efficiency of local data centres, geography and cloud 265 computing

266 Cloud computing facilities and large data centres are optimised to significantly reduce  
267 overhead power consumption such as cooling and lighting. A report from 2016 estimated  
268 that energy usage by data centres in the US could be reduced by 25% if 80% of the smaller  
269 data centres were aggregated into larger and more efficient data centres (hyperscale  
270 facilities) [66]. This was consistent with the distribution of PUEs (**Methods**): compared to the  
271 global average PUE of 1.67, Google Cloud's PUE of 1.11 [67] reduces the carbon footprint  
272 of a task by 34%. Other cloud providers also achieve low PUEs, Microsoft Azure reduces the  
273 carbon footprint by 33% (PUE=1.125 [68]) and Amazon Web Service by 28% (PUE=1.2  
274 [69]).

275  
276 The use of cloud facilities may also enable further reductions of carbon footprint by allowing  
277 for choice of a geographic location with relatively low carbon intensity. While the kgCO<sub>2</sub>e for  
278 specific analyses utilising cloud or local data centre platforms are best estimated with the  
279 Green Algorithm calculator ([www.green-algorithms.org](http://www.green-algorithms.org)), we found that a typical GWAS of  
280 UK Biobank considering 100 traits using the aforementioned GWAS framework (see  
281 **Genome-wide association analysis**) together with BoltLMM v2.3 on a Google Cloud server  
282 in the UK would lower the carbon footprint by 81% when compared to the average local data  
283 centre in Australia (**Figure 1**), potentially saving 705 kgCO<sub>2</sub>e (769 tree-months).

## 284 Parallelisation

285 Numerous algorithms use parallelisation to share the workload between several computing  
286 cores and reduce the total running time. However, this can increase carbon footprint [70] and  
287 we found that parallelisation frequently results in tradeoffs between running time and carbon  
288 footprint. In some cases, the reduction in running time is substantial. For example, executing  
289 the phylogenetic codon model (**Phylogenetics**) on a single core would take 7.8 hours and  
290 emit 0.066 kgCO<sub>2</sub>e, but with two cores, the carbon footprint increased by 4% while running  
291 time was decreased by 46% (1.9x speedup). With 12 cores, run time decreased 86% (7.2x  
292 speedup) but the carbon footprint increased by 57%. In other cases, speedup was marginal,  
293 e.g. the phylogeographic model had a running time of 3.86 hours with a carbon footprint of  
294 0.070 kgCO<sub>2</sub>e when using two cores (**Figure 2**). Increasing the parallelisation to 10 cores  
295 reduced run time by only 5% but increased carbon footprint by 4-fold.

## 296 Memory

297 Memory's power consumption depends mainly on the memory available, not on the memory  
298 used [70], [71]; thus, having too much memory available for a task results in unnecessary  
299 energy usage and GHG emissions. Although memory is usually a fixed parameter when  
300 working with a desktop computer or a laptop, most computational servers and cloud  
301 platforms give the option or require the user to choose the memory allocated. Given it is  
302 common practice to over-allocate memory out of caution, we investigated the impact of  
303 memory allocation on carbon footprint in bioinformatics (**Figure 3, Supplementary table 1**).  
304

305 We showed that, while increasing the allocated memory always increases the carbon  
306 footprint, the effect is particularly significant for tasks with large memory requirements  
307 (**Figure 3, Supplementary table 1**). For example, in *de novo* human genome assembly,  
308 MEGAHIT had higher memory requirements than ABySS (6% vs 1% of total energy  
309 consumption); as a result, a five-fold over-allocation of memory increases carbon footprint by  
310 30% for MEGAHIT and 6% for ABySS. Similarly, in human RNA read alignment (**Figure 3**),  
311 Novoalign had the highest memory requirements (37% of its total energy vs less than 7% for  
312 STAR, HISAT2, and TopHat2) and a 5x over-allocation in memory would increase its  
313 footprint by 186% compared to 32% for STAR, 2% for HISAT2, and 10% for TopHat2.

## 314 Processors

315 We estimated the carbon footprint of a number of algorithms executed on both GPUs and  
316 CPUs. For cis-eQTL mapping (**Genome-wide association analysis**), we estimated that,  
317 compared to CPU-based FastQTL and LIMIX, using a GPU-based software like TensorQTL  
318 can reduce the carbon footprint by 96% and 99% and the running time by 99.63% and  
319 99.99%, respectively (**Table 2**). For the codon modelling benchmark (**Phylogenetics**),  
320 utilising GPUs had a speedup factor of 93x and 13x when compared to 1 and 12 CPU cores,  
321 resulting in a decrease in carbon footprint of 75% and 84% respectively. These estimations  
322 demonstrate that GPUs can be well suited to both reducing running time and carbon  
323 footprint for algorithms.

324  
325 However, there are situations where the use of GPUs can increase carbon footprint. Using a  
326 GPU for phylogenetic nucleotide modelling (**Phylogenetics**), instead of 8 CPU cores,  
327 decreased running time by 31% but also doubled the carbon footprint. We estimated that a  
328 single GPU would need to run the model in under four minutes in order to have the lowest  
329 carbon footprint for this analysis, as opposed to the 16 minutes it currently takes. Similarly,  
330 using a GPU for the phylogeographic modelling of the Ebola virus dataset (**Phylogenetics**)  
331 reduced the running time by 83% (6x speedup) when compared to the method with the  
332 lowest footprint (2 CPU cores) however, this increased carbon footprint by 84%. There are  
333 equations used for this estimation (**Supplementary Note 1**); however, a fast approximation  
334 can be used by scaling the running time of the GPU by the ratio of the power draw of the  
335 CPU cores to the GPU. For example, we compared the popular Xeon E5-2683 CPU (using  
336 all 16 cores) to the Tesla V100 GPU and found that, to have the same carbon footprint with  
337 both configurations, an algorithm needs to run 2.5 times faster on GPU than CPU.

## 338 Discussion

339 We estimated the carbon footprint of various bioinformatic algorithms. Additionally, we  
340 investigated how memory over-allocation, processor choice and parallelisation affect carbon  
341 footprints, and showed the impact of transferring computations to hyperscale data centres.

342

343 This study made a series of important findings:

- 344 1. Limiting parallelisation can reduce carbon footprints. Especially when the running  
345 time reduction is marginal, the carbon cost of parallelisation should be closely  
346 examined.



- 347 2. Despite being often faster, GPUs don't necessarily have a smaller carbon footprint  
348 than CPUs, and it is useful to assess whether the running time reduction is large  
349 enough to offset the additional power consumption.
- 350 3. Using currently optimised data centres, either local or cloud-based, can reduce  
351 carbon footprints by ~34% on average.
- 352 4. Substantial reductions in carbon footprint can be made by performing computations  
353 in energy-efficient countries with low carbon intensity.
- 354 5. Carbon offsetting, which consists of supporting GHG-reducing projects can be a way  
355 to balance the greenhouse gas emissions of computations. Although a number of  
356 cloud providers take part in this, [69], [72], [73], the real impact of carbon offsetting is  
357 debated and reducing the amount of GHG emitted in the first place should be  
358 prioritised.
- 359 6. Over-allocating memory resources can unnecessarily, and significantly, increase the  
360 carbon footprint of a task, particularly if this task has high memory usage already. To  
361 decrease energy waste, one should only allocate as closely as possible the required  
362 memory for a given job. Additionally, softwares could be optimised to minimise  
363 memory requirements, potentially moving some aspects to disk where energy usage  
364 is far lower.
- 365 7. A simple way to reduce the carbon footprint of a given algorithm is to use the most up  
366 to date software. We showed that updating common GWAS software reduced carbon  
367 footprint by 73%, indicating that this may be the quickest, easiest, and potentially  
368 most impactful way to reduce one's carbon footprint.

369  
370 There are a number of assumptions made when estimating the energy and carbon footprint  
371 of a given computational algorithm. These assumptions, and the associated limitations, have  
372 been discussed in detail within Lannelongue et al. [70]. A particularly important limitation of  
373 our study is that many of the carbon footprints estimated are from a single run of any given  
374 tool; however, many analyses have parameters that must be fine-tuned through trial and  
375 error, frequently extensively so. For example, in machine learning, thousands of optimisation  
376 runs may be required. We would stress that the total carbon footprint of a given project will  
377 likely scale linearly with the number of times each analysis is tuned or repeated, so a caveat  
378 to our estimations and the underlying published benchmarks is that the real carbon footprints  
379 could be orders of magnitude greater than that reported here.

380  
381 Finally, the parameters needed to estimate the carbon footprint are often missing from  
382 published articles, such as running time, hardware information, and often software versions.  
383 If we are to fully understand the carbon footprint of the field of bioinformatics or  
384 computational research as a whole, there is a need for reporting this information as well as,  
385 ideally, for authors to estimate their carbon footprint using freely available tools.

## 386 Conclusion

387 This study is, to the best of our knowledge, the first to estimate the carbon footprint for  
388 common bioinformatics tools. We further investigated how parallelisation, memory over-  
389 allocation, and hardware choices affect carbon footprints. We also show that carbon  
390 footprints could be reduced by utilising efficient computing facilities. Finally, we outline a  
391 number of ways bioinformaticians may reduce their carbon footprint.

## 392 Methods

### 393 Selection of bioinformatic tools

394 We estimated the carbon footprint of a range of tasks across the field of bioinformatics:  
395 genome and metagenome assembly, long and short reads metagenomic classification,  
396 RNA-seq and phylogenetic analyses, GWAS, eQTL mapping algorithms, molecular  
397 simulations and molecular docking algorithms (**Table 1**). For each task, we curated the  
398 published literature to identify peer-reviewed studies which computationally benchmarked  
399 popular tools. For our analysis, we used 10 published scientific papers. To be selected,  
400 publications had to report at least the running time and preferably the following: memory  
401 usage, and hardware used for the experiments, in particular the model and number of  
402 processing cores. We selected 10 publications for this study (**Table 1**). Besides, as we could  
403 not find suitable benchmarks to estimate the carbon footprint of cohort-scale eQTL mapping  
404 and RNA-seq quality control pipelines, we estimated the carbon footprint of these tasks  
405 using in-house computations. These computations were run on the Baker Heart and  
406 Diabetes Institute computing cluster (Intel Xeon E5-2683 v4 CPUs and a Tesla T4 GPU) and  
407 the University of Cambridge's CSD3 computing cluster (Tesla P100 PCIe GPUs and Xeon  
408 Gold 6142 CPUs).

### 409 Estimating the carbon footprint

410 The carbon footprint of a given tool was calculated using the framework described in  
411 Lannelongue et al. [70] and the corresponding online calculator [www.green-algorithms.org](http://www.green-algorithms.org).  
412 We present here an overview of the methodology.

413  
414 Electricity production emits a variety of greenhouse gases, each with a different impact on  
415 climate change. To summarise this, the carbon footprint is measured in kilograms of CO<sub>2</sub>-  
416 equivalent (CO<sub>2</sub>e), which is the amount of carbon dioxide with an equivalent global warming  
417 impact as a mix of GHGs. This indicator depends on two factors: the energy needed to run  
418 the algorithm, and the global warming impact of producing such energy, called carbon  
419 intensity. This can be summarised by:

420

$$C = E \times CI \quad (1)$$

421

422 Where  $C$  is the carbon footprint (in kilograms of CO<sub>2</sub>e - kgCO<sub>2</sub>e),  $E$  is the energy needed (in  
423 W) and  $CI$  is the carbon intensity (in kgCO<sub>2</sub>e/W).

424

425 The energy needs of an algorithm are measured based on running time, processing cores  
426 used, memory deployed and efficiency of the data centre:

427

$$E = t \times (n_c \times P_c \times u_c + n_m + P_m) \times PUE \times 0.001 \quad (2)$$

428

429 Where  $t$  is the run time (h),  $n_c$  is the number of computing cores, used at  $u_c\%$ , the core  
430 usage factor (between 0 and 1), and each drawing a power  $P_c$  (W).  $n_m$  is the size of memory

431 available (GB), drawing a power  $P_m$  (W/GB). *PUE* is the Power Usage Effectiveness of the  
432 data centre.

433

434 The power drawn by a processor (CPU or GPU) is estimated by its Thermal Design Power  
435 (TDP) per core, which is provided by the manufacturer, and then scaled by the core usage  
436 factor  $u_c$ . The power draw from memory was estimated to be 0.3725 W/GB [70]. The PUE  
437 represents how much extra energy is needed to run the computing facilities, mainly for  
438 cooling and lighting.

439

440 The carbon intensity (*C*) varies between countries because of the heterogeneity in energy  
441 production methods, from 0.012 kgCO<sub>2</sub>e/kWh in Switzerland to 0.88 kgCO<sub>2</sub>e/kWh in  
442 Australia [74]. In order to be location-agnostic in this study, we used the global average  
443 value (0.475 kgCO<sub>2</sub>e/kWh [14]), unless otherwise specified.

## 444 Reference values for carbon footprints

445 A quantity of carbon dioxide is not a metric most scientists are familiar with. To put the  
446 results presented here into perspective, we compare them to the impact of familiar activities.

447 The first metric is the “tree-month”, defined as the number of months an average mature tree  
448 would take to fully sequester (absorb) an amount of carbon dioxide. A tree-month is defined  
449 as 0.917 kgCO<sub>2</sub>e [70]. Another way to contextualise a carbon footprint is to compare it with  
450 driving an average European car, which emits 0.175 kgCO<sub>2</sub>e/km [75], [76].

451

## 452 References

- 453 [1] L. Kachuri *et al.*, “Pan-cancer analysis demonstrates that integrating polygenic risk  
454 scores with modifiable risk factors improves risk prediction,” *Genetics*, preprint, Jan.  
455 2020. doi: 10.1101/2020.01.28.922088.
- 456 [2] The ICGC/TCGA Pan-Cancer Analysis of Whole Genomes Consortium, “Pan-cancer  
457 analysis of whole genomes,” *Nature*, vol. 578, no. 7793, pp. 82–93, Feb. 2020, doi:  
458 10.1038/s41586-020-1969-6.
- 459 [3] PCAWG Structural Variation Working Group *et al.*, “Patterns of somatic structural  
460 variation in human cancer genomes,” *Nature*, vol. 578, no. 7793, pp. 112–121, Feb.  
461 2020, doi: 10.1038/s41586-019-1913-9.
- 462 [4] The Severe Covid-19 GWAS Group, “Genomewide Association Study of Severe Covid-  
463 19 with Respiratory Failure,” *N. Engl. J. Med.*, vol. 383, no. 16, pp. 1522–1534, Oct.  
464 2020, doi: 10.1056/NEJMoa2020283.
- 465 [5] N. Jones, “Data centres are chewing up vast amounts of energy,” p. 5.
- 466 [6] “Primary energy consumption by world region,” *Our World in Data*.  
467 <https://ourworldindata.org/grapher/primary-energy-consumption-by-region> (accessed  
468 Jan. 25, 2021).
- 469 [7] A. Andrae and T. Edler, “On Global Electricity Usage of Communication Technology:  
470 Trends to 2030,” *Challenges*, vol. 6, no. 1, pp. 117–157, Apr. 2015, doi:  
471 10.3390/challe6010117.
- 472 [8] “Air pollution,” *World Health Organisation*. <https://www.who.int/westernpacific/health-topics/air-pollution> (accessed Oct. 17, 2020).
- 473 [9] N. Watts *et al.*, “The 2019 report of The Lancet Countdown on health and climate  
474 change: ensuring that the health of a child born today is not defined by a changing  
475 climate,” *The Lancet*, vol. 394, no. 10211, pp. 1836–1878, Nov. 2019, doi:  
476 10.1016/S0140-6736(19)32596-6.
- 477 [10] C. Bycroft *et al.*, “The UK Biobank resource with deep phenotyping and genomic data,”  
478 *Nature*, vol. 562, no. 7726, Art. no. 7726, Oct. 2018, doi: 10.1038/s41586-018-0579-z.
- 479 [11] “National Institutes of Health (NIH) — All of Us.” <https://allofus.nih.gov/> (accessed Oct.  
480 27, 2020).
- 481 [12] “Accelerating Detection of Disease - UK Research and Innovation.”  
482 [https://www.ukri.org/innovation/industrial-strategy-challenge-fund/accelerating-](https://www.ukri.org/innovation/industrial-strategy-challenge-fund/accelerating-detection-of-disease/)  
483 [detection-of-disease/](https://www.ukri.org/innovation/industrial-strategy-challenge-fund/accelerating-detection-of-disease/) (accessed Oct. 27, 2020).
- 484 [13] Andy Lawrence, “Is PUE actually going UP?,” *Uptime Institute Blog*, May 15, 2019.  
485 <https://journal.uptimeinstitute.com/is-pue-actually-going-up/> (accessed Apr. 14, 2020).
- 486 [14] “Emissions – Global Energy & CO2 Status Report 2019 – Analysis,” *IEA*.  
487 <https://www.iea.org/reports/global-energy-co2-status-report-2019/emissions> (accessed  
488 Feb. 10, 2020).
- 489 [15] M. Hunt, C. Newbold, M. Berriman, and T. D. Otto, “A comprehensive evaluation of  
490 assembly scaffolding tools,” *Genome Biol.*, vol. 15, no. 3, p. R42, Mar. 2014, doi:  
491 10.1186/gb-2014-15-3-r42.
- 492 [16] M. Boetzer, C. V. Henkel, H. J. Jansen, D. Butler, and W. Pirovano, “Scaffolding pre-  
493 assembled contigs using SSPACE,” *Bioinformatics*, vol. 27, no. 4, pp. 578–579, Feb.  
494 2011, doi: 10.1093/bioinformatics/btq683.
- 495 [17] J. T. Simpson and R. Durbin, “Efficient de novo assembly of large genomes using  
496 compressed data structures,” *Genome Res.*, vol. 22, no. 3, pp. 549–556, Mar. 2012,  
497 doi: 10.1101/gr.126953.111.
- 498 [18] R. Luo *et al.*, “SOAPdenovo2: an empirically improved memory-efficient short-read de  
499 novo assembler,” *GigaScience*, vol. 1, no. 1, Dec. 2012, doi: 10.1186/2047-217X-1-18.
- 500 [19] D. R. Zerbino and E. Birney, “Velvet: algorithms for de novo short read assembly using  
501 de Bruijn graphs,” *Genome Res.*, vol. 18, no. 5, pp. 821–829, May 2008, doi:  
502 10.1101/gr.074492.107.
- 503

- 504 [20] S. L. Salzberg *et al.*, “GAGE: A critical evaluation of genome assemblies and assembly  
505 algorithms,” *Genome Res.*, vol. 22, no. 3, pp. 557–567, Jan. 2012, doi:  
506 10.1101/gr.131383.111.
- 507 [21] T. D. S. Sutton, A. G. Clooney, F. J. Ryan, R. P. Ross, and C. Hill, “Choice of assembly  
508 software has a critical impact on virome characterisation,” *Microbiome*, vol. 7, no. 1,  
509 Dec. 2019, doi: 10.1186/s40168-019-0626-5.
- 510 [22] S. D. Jackman *et al.*, “ABYSS 2.0: resource-efficient assembly of large genomes using  
511 a Bloom filter,” *Genome Res.*, vol. 27, no. 5, pp. 768–777, May 2017, doi:  
512 10.1101/gr.214346.116.
- 513 [23] D. Li *et al.*, “MEGAHIT v1.0: A fast and scalable metagenome assembler driven by  
514 advanced methodologies and community practices,” *Methods San Diego Calif*, vol. 102,  
515 pp. 3–11, 01 2016, doi: 10.1016/j.ymeth.2016.02.020.
- 516 [24] J. Vollmers, S. Wiegand, and A.-K. Kaster, “Comparing and Evaluating Metagenome  
517 Assembly Tools from a Microbiologist’s Perspective - Not Only Size Matters!,” *PLOS*  
518 *ONE*, vol. 12, no. 1, p. e0169662, Jan. 2017, doi: 10.1371/journal.pone.0169662.
- 519 [25] S. Nurk, D. Meleshko, A. Korobeynikov, and P. Pevzner, “metaSPAdes: a new versatile  
520 de novo metagenomics assembler,” *ArXiv160403071 Q-Bio*, Aug. 2016, Accessed: Oct.  
521 28, 2020. [Online]. Available: <http://arxiv.org/abs/1604.03071>.
- 522 [26] T. Namiki, T. Hachiya, H. Tanaka, and Y. Sakakibara, “MetaVelvet: an extension of  
523 Velvet assembler to de novo metagenome assembly from short sequence reads,”  
524 *Nucleic Acids Res.*, vol. 40, no. 20, p. e155, Nov. 2012, doi: 10.1093/nar/gks678.
- 525 [27] A. T. Dilthey, C. Jain, S. Koren, and A. M. Phillippy, “Strain-level metagenomic  
526 assignment and compositional estimation for long reads with MetaMaps,” *Nat.*  
527 *Commun.*, vol. 10, no. 1, Art. no. 1, Jul. 2019, doi: 10.1038/s41467-019-10934-2.
- 528 [28] D. E. Wood, J. Lu, and B. Langmead, “Improved metagenomic analysis with Kraken 2,”  
529 *Genome Biol.*, vol. 20, no. 1, p. 257, Nov. 2019, doi: 10.1186/s13059-019-1891-0.
- 530 [29] D. E. Wood and S. L. Salzberg, “Kraken: ultrafast metagenomic sequence classification  
531 using exact alignments,” *Genome Biol.*, vol. 15, no. 3, p. R46, Mar. 2014, doi:  
532 10.1186/gb-2014-15-3-r46.
- 533 [30] J. Lu, F. P. Breitwieser, P. Thielen, and S. L. Salzberg, “Bracken: estimating species  
534 abundance in metagenomics data,” *PeerJ Comput. Sci.*, vol. 3, p. e104, Jan. 2017, doi:  
535 10.7717/peerj-cs.104.
- 536 [31] D. Kim, L. Song, F. P. Breitwieser, and S. L. Salzberg, “Centrifuge: rapid and sensitive  
537 classification of metagenomic sequences,” *Genome Res.*, vol. 26, no. 12, pp. 1721–  
538 1729, Dec. 2016, doi: 10.1101/gr.210641.116.
- 539 [32] G. Baele, D. L. Ayres, A. Rambaut, M. A. Suchard, and P. Lemey, “High-Performance  
540 Computing in Bayesian Phylogenetics and Phylodynamics Using BEAGLE,” in  
541 *Evolutionary Genomics: Statistical and Computational Methods*, M. Anisimova, Ed.  
542 New York, NY: Springer, 2019, pp. 691–722.
- 543 [33] G. Dudas *et al.*, “Virus genomes reveal factors that spread and sustained the Ebola  
544 epidemic,” *Nature*, vol. 544, no. 7650, pp. 309–315, 20 2017, doi:  
545 10.1038/nature22040.
- 546 [34] D. L. Ayres *et al.*, “BEAGLE: An Application Programming Interface and High-  
547 Performance Computing Library for Statistical Phylogenetics,” *Syst. Biol.*, vol. 61, no. 1,  
548 pp. 170–173, Jan. 2012, doi: 10.1093/sysbio/syr100.
- 549 [35] H. A. Ogilvie, J. Heled, D. Xie, and A. J. Drummond, “Computational Performance and  
550 Statistical Accuracy of \*BEAST and Comparisons with Other Methods,” *Syst. Biol.*, vol.  
551 65, no. 3, pp. 381–396, May 2016, doi: 10.1093/sysbio/syv118.
- 552 [36] G. Baruzzo, K. E. Hayer, E. J. Kim, B. Di Camillo, G. A. FitzGerald, and G. R. Grant,  
553 “Simulation-based comprehensive benchmarking of RNA-seq aligners,” *Nat. Methods*,  
554 vol. 14, no. 2, Art. no. 2, Feb. 2017, doi: 10.1038/nmeth.4106.
- 555 [37] A. Dobin *et al.*, “STAR: ultrafast universal RNA-seq aligner,” *Bioinformatics*, vol. 29, no.  
556 1, pp. 15–21, Jan. 2013, doi: 10.1093/bioinformatics/bts635.

- 557 [38] D. Kim, J. M. Paggi, C. Park, C. Bennett, and S. L. Salzberg, "Graph-based genome  
558 alignment and genotyping with HISAT2 and HISAT-genotype," *Nat. Biotechnol.*, vol. 37,  
559 no. 8, pp. 907–915, Aug. 2019, doi: 10.1038/s41587-019-0201-4.
- 560 [39] D. Kim, G. Pertea, C. Trapnell, H. Pimentel, R. Kelley, and S. L. Salzberg, "TopHat2:  
561 accurate alignment of transcriptomes in the presence of insertions, deletions and gene  
562 fusions," *Genome Biol.*, vol. 14, no. 4, p. R36, Apr. 2013, doi: 10.1186/gb-2013-14-4-  
563 r36.
- 564 [40] "NovoAlign | Novocraft." <http://www.novocraft.com/products/novoalign/> (accessed Nov.  
565 14, 2020).
- 566 [41] M. M. H. Kusel, N. H. de Klerk, P. G. Holt, T. Keadze, S. L. Johnston, and P. D. Sly,  
567 "Role of Respiratory Viruses in Acute Upper and Lower Respiratory Tract Illness in the  
568 First Year of Life: A Birth Cohort Study," *Pediatr. Infect. Dis. J.*, vol. 25, no. 8, pp. 680–  
569 686, Aug. 2006, doi: 10.1097/01.inf.0000226912.88900.a3.
- 570 [42] M. M. H. Kusel *et al.*, "Early-life respiratory viral infections, atopic sensitization, and risk  
571 of subsequent development of persistent asthma," *J. Allergy Clin. Immunol.*, vol. 119,  
572 no. 5, pp. 1105–1110, May 2007, doi: 10.1016/j.jaci.2006.12.669.
- 573 [43] "Babraham Bioinformatics - Trim Galore!"  
574 [https://www.bioinformatics.babraham.ac.uk/projects/trim\\_galore/](https://www.bioinformatics.babraham.ac.uk/projects/trim_galore/) (accessed Jul. 27,  
575 2020).
- 576 [44] "BBMap Guide," *DOE Joint Genome Institute*. [https://jgi.doe.gov/data-and-  
577 tools/bbtools/bb-tools-user-guide/bbmap-guide/](https://jgi.doe.gov/data-and-tools/bbtools/bb-tools-user-guide/bbmap-guide/) (accessed Jul. 27, 2020).
- 578 [45] R. Patro, S. M. Mount, and C. Kingsford, "Sailfish enables alignment-free isoform  
579 quantification from RNA-seq reads using lightweight algorithms," *Nat. Biotechnol.*, vol.  
580 32, no. 5, pp. 462–464, May 2014, doi: 10.1038/nbt.2862.
- 581 [46] B. Li and C. N. Dewey, "RSEM: accurate transcript quantification from RNA-Seq data  
582 with or without a reference genome," p. 16, 2011.
- 583 [47] C. Trapnell *et al.*, "Transcript assembly and quantification by RNA-Seq reveals  
584 unannotated transcripts and isoform switching during cell differentiation," *Nat.*  
585 *Biotechnol.*, vol. 28, no. 5, pp. 511–515, May 2010, doi: 10.1038/nbt.1621.
- 586 [48] A. Kanitz, F. Gypas, A. J. Gruber, A. R. Gruber, G. Martin, and M. Zavolan,  
587 "Comparative assessment of methods for the computational inference of transcript  
588 isoform abundance from RNA-seq data," *Genome Biol.*, vol. 16, no. 1, 2015, doi:  
589 10.1186/s13059-015-0702-5.
- 590 [49] T. Griebel *et al.*, "Modelling and simulating generic RNA-Seq experiments with the flux  
591 simulator," *Nucleic Acids Res.*, vol. 40, no. 20, pp. 10073–10083, Nov. 2012, doi:  
592 10.1093/nar/gks666.
- 593 [50] J. Harrow *et al.*, "GENCODE: the reference human genome annotation for The  
594 ENCODE Project," *Genome Res.*, vol. 22, no. 9, pp. 1760–1774, Sep. 2012, doi:  
595 10.1101/gr.135350.111.
- 596 [51] P.-R. Loh, G. Kichaev, S. Gazal, A. P. Schoech, and A. L. Price, "Mixed-model  
597 association for biobank-scale datasets," *Nat. Genet.*, vol. 50, no. 7, pp. 906–908, Jul.  
598 2018, doi: 10.1038/s41588-018-0144-6.
- 599 [52] "BOLT-LMM v2.3.4 User Manual." [https://data.broadinstitute.org/alkesgroup/BOLT-  
600 LMM/#x1-150003.2](https://data.broadinstitute.org/alkesgroup/BOLT-LMM/#x1-150003.2) (accessed Jul. 23, 2020).
- 601 [53] "Genetic effects on gene expression across human tissues," *Nature*, vol. 550, no. 7675,  
602 pp. 204–213, Oct. 2017, doi: 10.1038/nature24277.
- 603 [54] H. Ongen, A. Buil, A. A. Brown, E. T. Dermitzakis, and O. Delaneau, "Fast and efficient  
604 QTL mapper for thousands of molecular phenotypes," *Bioinformatics*, vol. 32, no. 10,  
605 pp. 1479–1485, May 2016, doi: 10.1093/bioinformatics/btv722.
- 606 [55] *broadinstitute/tensorqtl*. Broad Institute, 2020.
- 607 [56] A. Taylor-Weiner *et al.*, "Scaling computational genomics to millions of individuals with  
608 GPUs," *Genome Biol.*, vol. 20, no. 1, p. 228, Nov. 2019, doi: 10.1186/s13059-019-  
609 1836-7.
- 610 [57] C. Lippert, F. P. Casale, B. Rakitsch, and O. Stegle, "LIMIX: genetic analysis of multiple  
611 traits," *Genetics*, preprint, May 2014. doi: 10.1101/003905.

- 612 [58] “NAMD Performance.” <https://www.ks.uiuc.edu/Research/namd/benchmarks/>  
613 (accessed Jul. 25, 2020).
- 614 [59] “The pmemd.cuda GPU Implementation.” <https://ambermd.org/GPUPerformance.php>  
615 (accessed Jul. 23, 2020).
- 616 [60] D. A. Case *et al.*, “The Amber biomolecular simulation programs,” *J. Comput. Chem.*,  
617 vol. 26, no. 16, pp. 1668–1688, 2005, doi: 10.1002/jcc.20290.
- 618 [61] J. C. Phillips *et al.*, “Scalable Molecular Dynamics with NAMD,” *J. Comput. Chem.*, vol.  
619 26, no. 16, pp. 1781–1802, Dec. 2005, doi: 10.1002/jcc.20289.
- 620 [62] S. Ruiz-Carmona *et al.*, “rDock: A Fast, Versatile and Open Source Program for  
621 Docking Ligands to Proteins and Nucleic Acids,” *PLoS Comput. Biol.*, vol. 10, no. 4, p.  
622 e1003571, Apr. 2014, doi: 10.1371/journal.pcbi.1003571.
- 623 [63] O. Trott and A. J. Olson, “AutoDock Vina: improving the speed and accuracy of docking  
624 with a new scoring function, efficient optimization and multithreading,” *J. Comput.*  
625 *Chem.*, vol. 31, no. 2, pp. 455–461, Jan. 2010, doi: 10.1002/jcc.21334.
- 626 [64] R. A. Friesner *et al.*, “Glide: A New Approach for Rapid, Accurate Docking and Scoring.  
627 1. Method and Assessment of Docking Accuracy,” *J. Med. Chem.*, vol. 47, no. 7, pp.  
628 1739–1749, Mar. 2004, doi: 10.1021/jm0306430.
- 629 [65] N. Huang, B. K. Shoichet, and J. J. Irwin, “Benchmarking Sets for Molecular Docking,”  
630 *J. Med. Chem.*, vol. 49, no. 23, pp. 6789–6801, Nov. 2006, doi: 10.1021/jm0608356.
- 631 [66] A. Shehabi *et al.*, “United States Data Center Energy Usage Report,” LBNL--1005775,  
632 1372902, Jun. 2016. doi: 10.2172/1372902.
- 633 [67] “Efficiency – Data Centers – Google,” *Google Data Centers*.  
634 <https://www.google.com/about/datacenters/efficiency/> (accessed Jul. 27, 2020).
- 635 [68] Microsoft, “Microsoft’s Cloud Infrastructure, Datacenters and Network Fact Sheet.”  
636 Microsoft Corporation, Jun. 2015, [Online]. Available:  
637 [http://download.microsoft.com/download/8/2/9/8297f7c7-ae81-4e99-b1db-](http://download.microsoft.com/download/8/2/9/8297f7c7-ae81-4e99-b1db-d65a01f7a8ef/microsoft_cloud_infrastructure_datacenter_and_network_fact_sheet.pdf)  
638 [d65a01f7a8ef/microsoft\\_cloud\\_infrastructure\\_datacenter\\_and\\_network\\_fact\\_sheet.pdf](http://download.microsoft.com/download/8/2/9/8297f7c7-ae81-4e99-b1db-d65a01f7a8ef/microsoft_cloud_infrastructure_datacenter_and_network_fact_sheet.pdf).
- 639 [69] “AWS & Sustainability,” *Amazon Web Services, Inc.* [https://aws.amazon.com/about-](https://aws.amazon.com/about-aws/sustainability/)  
640 [aws/sustainability/](https://aws.amazon.com/about-aws/sustainability/) (accessed Jul. 27, 2020).
- 641 [70] L. Lannelongue, J. Grealey, and M. Inouye, “Green Algorithms: Quantifying the carbon  
642 footprint of computation,” *ArXiv200707610 Cs*, Dec. 2020, Accessed: Mar. 07, 2021.  
643 [Online]. Available: <http://arxiv.org/abs/2007.07610>.
- 644 [71] A. Karyakin and K. Salem, “An analysis of memory power consumption in database  
645 systems,” in *Proceedings of the 13th International Workshop on Data Management on*  
646 *New Hardware - DAMON '17*, Chicago, Illinois, 2017, pp. 1–9, doi:  
647 10.1145/3076113.3076117.
- 648 [72] “Google Cloud Environment | Go Green,” *Google Cloud*.  
649 <https://cloud.google.com/sustainability> (accessed Jul. 31, 2020).
- 650 [73] “Global Infrastructure | Microsoft Azure.” [https://azure.microsoft.com/en-us/global-](https://azure.microsoft.com/en-us/global-infrastructure/)  
651 [infrastructure/](https://azure.microsoft.com/en-us/global-infrastructure/) (accessed Jul. 31, 2020).
- 652 [74] “carbonfootprint.com - International Electricity Factors.”  
653 [https://www.carbonfootprint.com/international\\_electricity\\_factors.html](https://www.carbonfootprint.com/international_electricity_factors.html) (accessed Jan.  
654 21, 2021).
- 655 [75] “Greenhouse gas reporting: conversion factors 2019,” *GOV.UK*.  
656 [https://www.gov.uk/government/publications/greenhouse-gas-reporting-conversion-](https://www.gov.uk/government/publications/greenhouse-gas-reporting-conversion-factors-2019)  
657 [factors-2019](https://www.gov.uk/government/publications/greenhouse-gas-reporting-conversion-factors-2019) (accessed Feb. 24, 2021).
- 658 [76] E. Helmers, J. Leitão, U. Tietge, and T. Butler, “CO<sub>2</sub>-equivalent emissions from  
659 European passenger vehicles in the years 1995–2015 based on real-world use:  
660 Assessing the climate benefit of the European ‘diesel boom,’” *Atmos. Environ.*, vol. 198,  
661 pp. 122–132, Feb. 2019, doi: 10.1016/j.atmosenv.2018.10.039.  
662

663

## 664 Acknowledgement

665 We thank Kim van Daalen for the fruitful discussions about the impact of climate change on  
666 human health. JG was supported by a La Trobe University Postgraduate Research  
667 Scholarship jointly funded by the Baker Heart and Diabetes Institute and a La Trobe  
668 University Full-Fee Research Scholarship. LL was supported by the University of Cambridge  
669 MRC DTP (MR/S502443/1). This work was supported by core funding from: the UK Medical  
670 Research Council (MR/L003120/1), the British Heart Foundation (RG/13/13/30194;  
671 RG/18/13/33946) and the National Institute for Health Research [Cambridge Biomedical  
672 Research Centre at the Cambridge University Hospitals NHS Foundation Trust] [\*]. This  
673 work was also supported by Health Data Research UK, which is funded by the UK Medical  
674 Research Council, Engineering and Physical Sciences Research Council, Economic and  
675 Social Research Council, Department of Health and Social Care (England), Chief Scientist  
676 Office of the Scottish Government Health and Social Care Directorates, Health and Social  
677 Care Research and Development Division (Welsh Government), Public Health Agency  
678 (Northern Ireland), British Heart Foundation and Wellcome. MI was supported by the Munz  
679 Chair of Cardiovascular Prediction and Prevention. This study was supported by the  
680 Victorian Government's Operational Infrastructure Support (OIS) program. \*The views  
681 expressed are those of the authors and not necessarily those of the NHS, the NIHR or the  
682 Department of Health and Social Care. JM is currently an employee of Genomics PLC.

## 683 Availability of data and materials

684 The datasets used to support the conclusions of this article are available in supplementary  
685 information Additional file 1. The calculator used to estimate the carbon footprint is available  
686 at <https://green-algorithms.org/>, the code is available at  
687 <https://github.com/GreenAlgorithms/green-algorithms-tool> and the method behind it is  
688 described in Lannelongue et al [70].

689

690



691 **Tables**

692 **Table 1: A description of the tasks, tools and experiments used in this study.**

693

| Task                                           | Tool                                        | Version          | Details about the experiments                                                                                                                                 | Benchmarking publication                           |
|------------------------------------------------|---------------------------------------------|------------------|---------------------------------------------------------------------------------------------------------------------------------------------------------------|----------------------------------------------------|
| <b>Genome scaffolding</b>                      | SSPACE                                      | 2.0              | Scaffolding with long (2.4 M) and short (23 M) reads from human chromosome 14.                                                                                | <i>Hunt et al., Genome Biology, 2014</i>           |
|                                                | SGA                                         | 0.9.43           |                                                                                                                                                               |                                                    |
|                                                | SOAPdenovo                                  | r223             |                                                                                                                                                               |                                                    |
| <b>Genome assembly</b>                         | Abyss                                       | 2.0              | De novo assembly of a human genome from Illumina sequencing reads.                                                                                            | <i>Jackman et al., Genome Res., 2017</i>           |
|                                                | MEGAHIT                                     | 1.0.6            |                                                                                                                                                               |                                                    |
| <b>Metagenome assembly</b>                     | metaSPAdes                                  | 3.8.0            | Metagenome assembly from 100 soil samples.                                                                                                                    | <i>Vollmers et al., PLOS One, 2017</i>             |
|                                                | MEGAHIT                                     | 1.0.3            |                                                                                                                                                               |                                                    |
|                                                | MetaVelvet k101                             | 1.2.01           |                                                                                                                                                               |                                                    |
| <b>Metagenome classification</b>               | Metamaps                                    | -                | Metagenomic classification of 5Gb of randomly sampled reads from Zymo mock community (batch ZRC190633), containing yeast, gram-negative and positive bacteria | <i>Dilthey et al., Nature Communications, 2019</i> |
|                                                | Kraken2                                     | 2.0.7            |                                                                                                                                                               |                                                    |
|                                                | kraken/Bracken                              | 0.10.5/1.0.0     |                                                                                                                                                               |                                                    |
|                                                | Centrifuge                                  | 1.0.4            |                                                                                                                                                               |                                                    |
| <b>Phylogenetics</b>                           | BEAST/BEAGLE                                | 1.8.4/2.1.2      | Codon substitution modelling of extant carnivores and a pangolin group. Nucleotide substitution and phylogeographic modelling of Ebola virus genomes.         | <i>Baele et al. Evolutionary Genomics, 2019</i>    |
| <b>RNA reads alignment</b>                     | STAR                                        | 2.5.0a           | Reads alignment to two genomes: <i>Homo Sapiens hg19</i> and <i>Plasmodium falciparum</i> .                                                                   | <i>Baruzzo et al., Nature Methods, 2017</i>        |
|                                                | HIAS2                                       | 2.0.0beta        |                                                                                                                                                               |                                                    |
|                                                | TopHat2                                     | 2.1.0            |                                                                                                                                                               |                                                    |
|                                                | Novoalign                                   | 3.02.13          |                                                                                                                                                               |                                                    |
| <b>RNA-seq QC</b>                              | FastQC, TrimGalore, bbmap/clumpify and STAR | -v0.6.0/-v2.7.0e | Quality control analysis of raw reads quality of 392 samples from the Childhood Asthma Study.                                                                 | <i>In-house</i>                                    |
| <b>Transcript isoform abundance estimation</b> | Sailfish                                    | 0.6.3            | Transcript isoform quantification of 100 million <i>in silico</i> reads generated from Flux Simulator with hg19 genome and GENCODE v19 annotation set         | <i>Kanitz et al, Genome Biology, 2015</i>          |
|                                                | RSEM                                        | 1.2.18           |                                                                                                                                                               |                                                    |
|                                                | Cufflinks                                   | 2.1.1            |                                                                                                                                                               |                                                    |
| <b>GWAS</b>                                    | Bolt-LMM                                    | 2.3              | Analyses of a single trait in UK Biobank (N=500,000)                                                                                                          | <i>Loh et al., Nature Genetics, 2018</i>           |

|                                      |                      |        |                                                                                                                                                                                                                                |                                                                                                                                                                                                                    |
|--------------------------------------|----------------------|--------|--------------------------------------------------------------------------------------------------------------------------------------------------------------------------------------------------------------------------------|--------------------------------------------------------------------------------------------------------------------------------------------------------------------------------------------------------------------|
|                                      | Bolt-LMM             | 1.0    |                                                                                                                                                                                                                                |                                                                                                                                                                                                                    |
| <b>Cohort scale eQTL analysis</b>    | LIMIX                | 2.0.3  | Cis-eQTL mapping of 10.7M SNPs against 18,373 genetic features in a cohort of 2,745 individuals.                                                                                                                               | <i>In-house</i>                                                                                                                                                                                                    |
|                                      | TensorQTL            | 1.0.2  |                                                                                                                                                                                                                                |                                                                                                                                                                                                                    |
| <b>Single cis-eQTL gene mapping</b>  | FastQTL<br>TensorQTL | -<br>- | Cis-eQTL mapping one gene from skeletal muscle in GTEx (v6p).                                                                                                                                                                  | <i>Taylor-Weiner et al. Genome Biology, 2019</i>                                                                                                                                                                   |
| <b>Molecular dynamics simulation</b> | AMBER                | 18     | Simulation of a Satellite Tobacco Mosaic Virus with 1,066,628 atoms for 100ns. Note different simulation parameters AMBER18 (4fs timestep, 9A cutoff) NAMD (2fs timestep with rigid bonds, 12A cutoff with PME every 2 steps). | <a href="https://ambermd.org/GPU_Performance.php">https://ambermd.org/GPU_Performance.php</a><br><a href="https://www.ks.uiuc.edu/Research/namd/benchmarks/">https://www.ks.uiuc.edu/Research/namd/benchmarks/</a> |
|                                      | NAMD                 | 2.13   |                                                                                                                                                                                                                                |                                                                                                                                                                                                                    |
| <b>Molecular Docking</b>             | AutDock Vina         | -      | Molecular docking of four DUD systems, scaled to 1m ligands                                                                                                                                                                    | <i>Ruiz-Carmona et al. PLOS Computational Biology, 2014</i>                                                                                                                                                        |
|                                      | Glide                | 57111  |                                                                                                                                                                                                                                |                                                                                                                                                                                                                    |
|                                      | rDock                | -      |                                                                                                                                                                                                                                |                                                                                                                                                                                                                    |

694

695

696 **Table 2: The estimated carbon footprint of bioinformatic tasks.** This table details and  
 697 contextualises the carbon footprint of the tasks detailed in Table 1. In addition to the carbon  
 698 footprints are the number of tree-months it would take an adult tree to sequester the CO<sub>2</sub>,  
 699 and the number of kilometres one could travel in an average European car to output the  
 700 same amount of CO<sub>2</sub>. \*These methods were estimated in-house and not from a published  
 701 benchmark.

| Task                                            | Tool                                         | Carbon footprint (kgCO <sub>2</sub> e) | tree-months | km in a car (EU) |
|-------------------------------------------------|----------------------------------------------|----------------------------------------|-------------|------------------|
| Genome scaffolding (long read)                  | SGA                                          | 0.0293                                 | 0.0319      | 0.2              |
|                                                 | SSPACE                                       | 0.0010                                 | 0.0011      | 0.01             |
|                                                 | SOAPdenovo2                                  | 0.0015                                 | 0.0016      | 0.01             |
| Genome scaffolding (short read)                 | SGA                                          | 0.1302                                 | 0.1420      | 0.7              |
|                                                 | SSPACE                                       | 0.0027                                 | 0.0029      | 0.02             |
|                                                 | SOAPdenovo2                                  | 0.0036                                 | 0.0039      | 0.02             |
| De novo assembly of one human genome            | Abyss2.0                                     | 10.66                                  | 11.63       | 60.9             |
|                                                 | MEGAHIT                                      | 15.11                                  | 16.48       | 86.3             |
| Metagenome assembly                             | metaSPAdes                                   | 186.46                                 | 203.41      | 1,065.5          |
|                                                 | MEGAHIT                                      | 76.81                                  | 83.79       | 438.9            |
|                                                 | Meta Velvet k101                             | 14.28                                  | 15.58       | 81.6             |
| Metagenome classification (short read)          | Centrifuge                                   | 0.013                                  | 0.0138      | 0.1              |
|                                                 | Kraken2                                      | 0.0052                                 | 0.0057      | 0.03             |
|                                                 | Kraken/Bracken                               | 0.092                                  | 0.1000      | 0.5              |
| Metagenome classification (long read)           | MetaMaps                                     | 18.25                                  | 19.91       | 104.3            |
| RNA read alignment <i>Homo Sapiens hg19</i>     | STAR v2.5.0a                                 | 0.0097                                 | 0.0105      | 0.1              |
|                                                 | HISAT2                                       | 0.0054                                 | 0.0059      | 0.03             |
|                                                 | TopHat2                                      | 0.3173                                 | 0.3461      | 1.8              |
|                                                 | Novoalign                                    | 0.9766                                 | 1.0653      | 5.6              |
| RNA read alignment <i>Plasmodium falciparum</i> | STAR v2.5.0a                                 | 0.3693                                 | 0.4029      | 2.1              |
|                                                 | HISAT2                                       | 0.0052                                 | 0.0057      | 0.03             |
|                                                 | TopHat2                                      | 0.2394                                 | 0.2612      | 1.4              |
|                                                 | Novoalign                                    | 0.6710                                 | 0.7320      | 3.8              |
| *RNA sequencing quality control pipeline        | FastQC + TrimGalore + clumpify + STARv2.7.0e | 54.97                                  | 59.97       | 314.1            |
| Transcript isoform abundance estimation         | Cufflinks - 1 core                           | 0.045                                  | 0.049       | 0.3              |
|                                                 | RSEM - 1 core                                | 0.57                                   | 0.63        | 3.3              |
|                                                 | Sailfish - 1 core                            | 0.0081                                 | 0.0088      | 0.05             |
|                                                 | Cufflinks - 16 cores                         | 0.27                                   | 0.30        | 1.6              |
|                                                 | RSEM - 16 cores                              | 1.40                                   | 1.53        | 8.0              |

|                                             |                           |         |         |         |
|---------------------------------------------|---------------------------|---------|---------|---------|
|                                             | <i>Sailfish - 16 core</i> | 0.036   | 0.039   | 0.2     |
| <b>GWAS on a biobank with 1 trait</b>       | <i>Bolt-LMM v1</i>        | 17.29   | 18.86   | 98.8    |
|                                             | <i>Bolt-LMM v2.3</i>      | 4.70    | 5.13    | 26.9    |
| <b>*eQTL mapping for a cohort</b>           | <i>TensorQTL</i>          | 2.04    | 2.22    | 11.6    |
|                                             | <i>LIMIX</i>              | 190.73  | 208.07  | 1,089.9 |
| <b>cis-eQTL mapping for 1 gene</b>          | <i>FastQTL</i>            | 0.0002  | 0.0002  | 0.001   |
|                                             | <i>TensorQTL</i>          | 0.00001 | 0.00001 | 0.00004 |
| <b>Virus molecular dynamics simulations</b> | <i>AMBER18</i>            | 17.85   | 19.47   | 102.0   |
|                                             | <i>NAMD 2.13</i>          | 95.19   | 103.84  | 543.9   |
| <b>Molecular docking</b>                    | <i>AutoDock Vina</i>      | 514.12  | 560.86  | 2,937.9 |
|                                             | <i>Glide</i>              | 12.90   | 14.07   | 73.7    |
|                                             | <i>rDock</i>              | 153.71  | 167.69  | 878.4   |

702

## 703 Figures

704

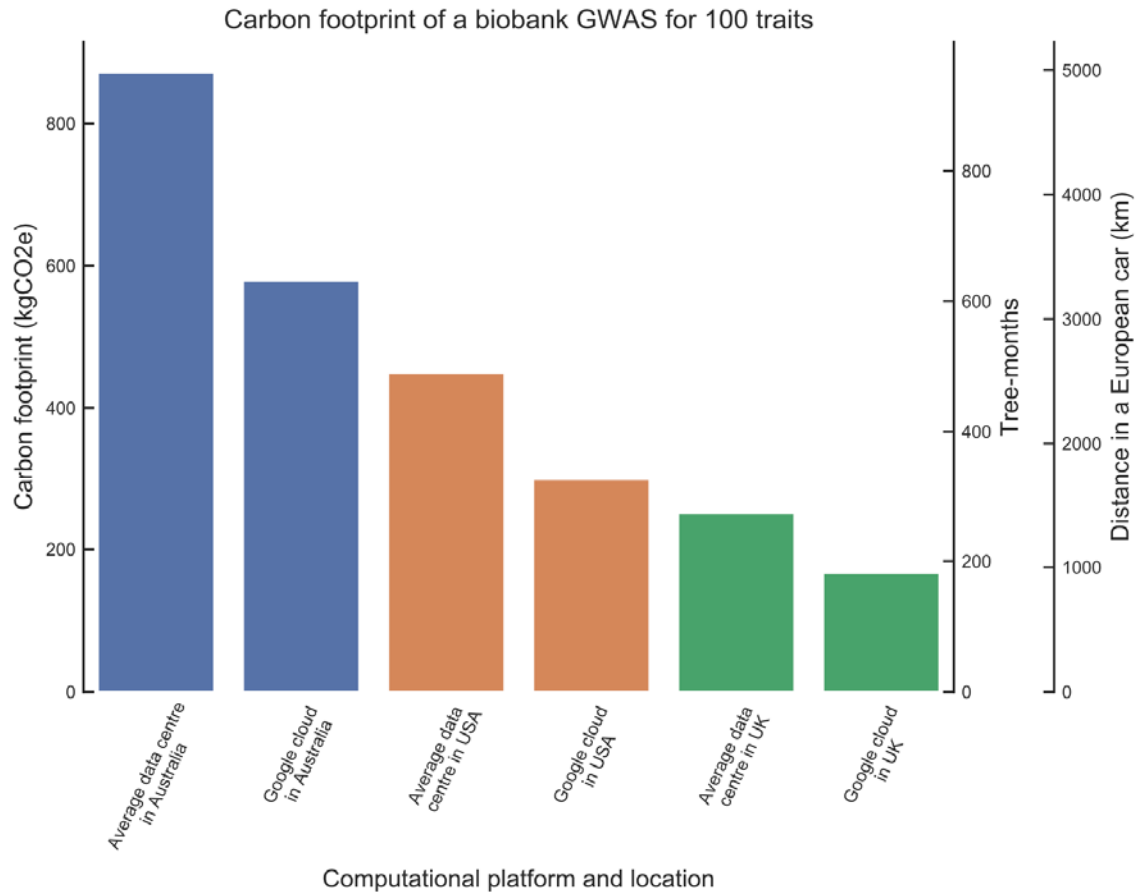

705

706

**Figure 1, Location and computational platforms affect carbon footprint.** This plot details the carbon footprint (in kgCO<sub>2</sub>e, tree-months, and European car km) of a biobank scale 100 trait GWAS in various locations and platforms. Average data centres have a PUE of 1.67 [13], Google cloud has PUE of 1.11[67], Australia has a carbon intensity of 0.88 kgCO<sub>2</sub>e/kWh, USA 0.453 kgCO<sub>2</sub>e/kWh, and UK 0.253 kgCO<sub>2</sub>e/kWh [74].

707

708

709

710

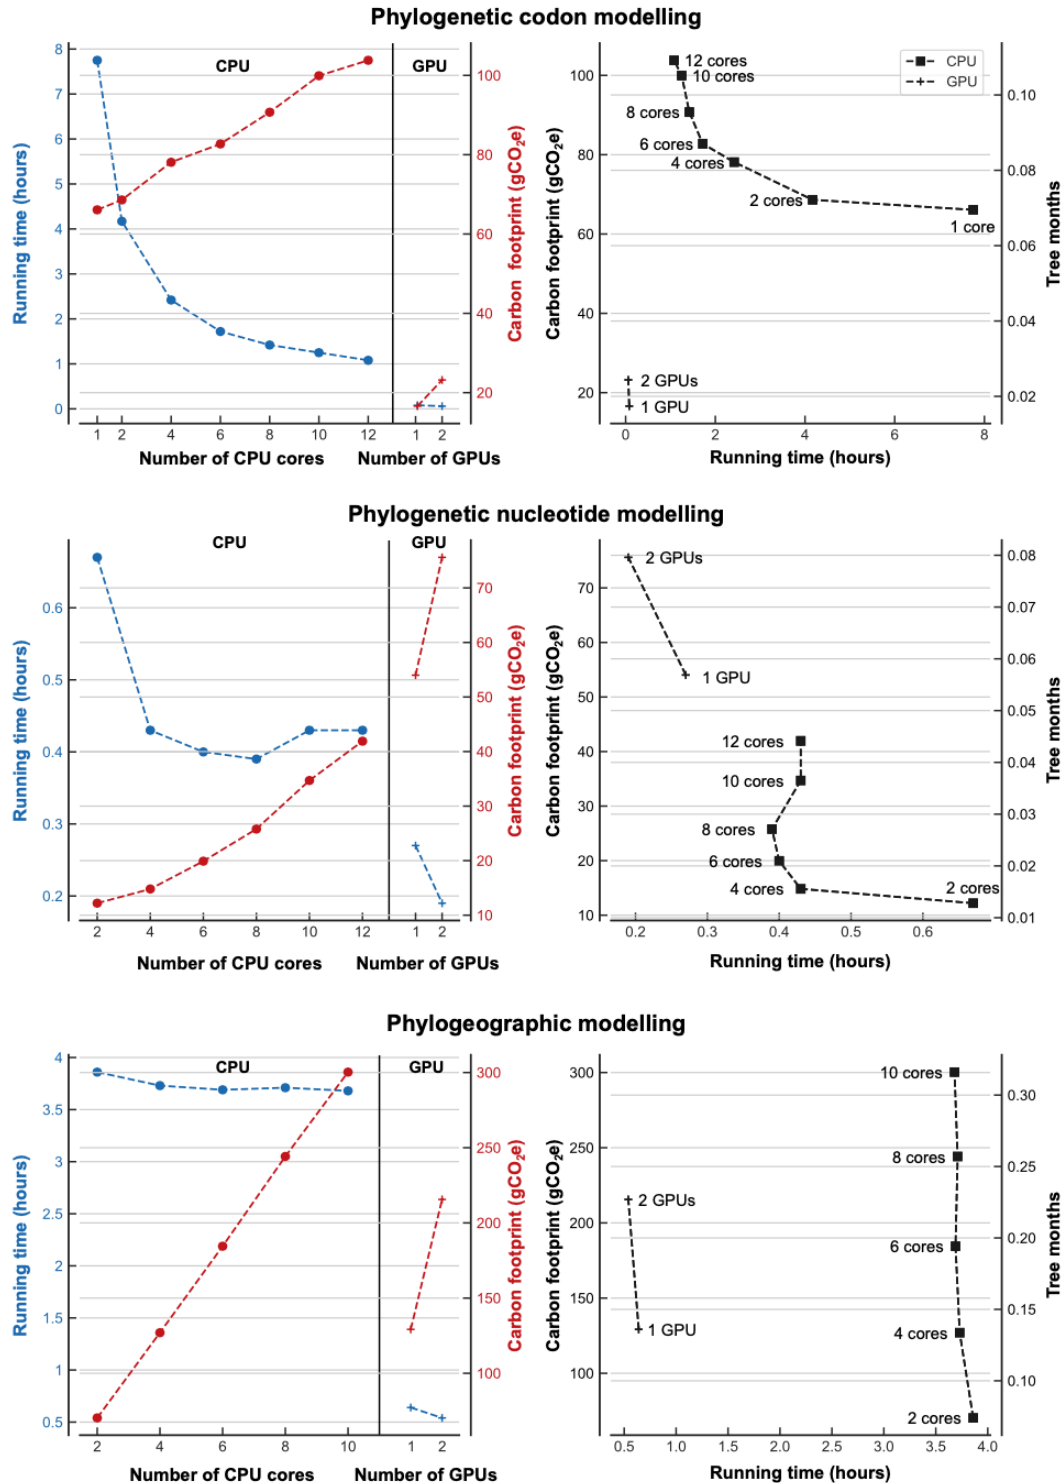

711  
712  
713  
714  
715  
716  
717

**Figure 2: The effect of hardware choices and parallelisation on carbon footprint.** The carbon footprint of BEAST/Beagle implemented on multi-core CPU or GPUs for three different tasks. The plots on the left detail both the running time and carbon footprint against the number of cores utilised. The plots on the right detail the running time solely against carbon footprint (contextualised with tree-months) for both CPUs and GPUs. The numerical data is available in **Supplementary Table 2**.

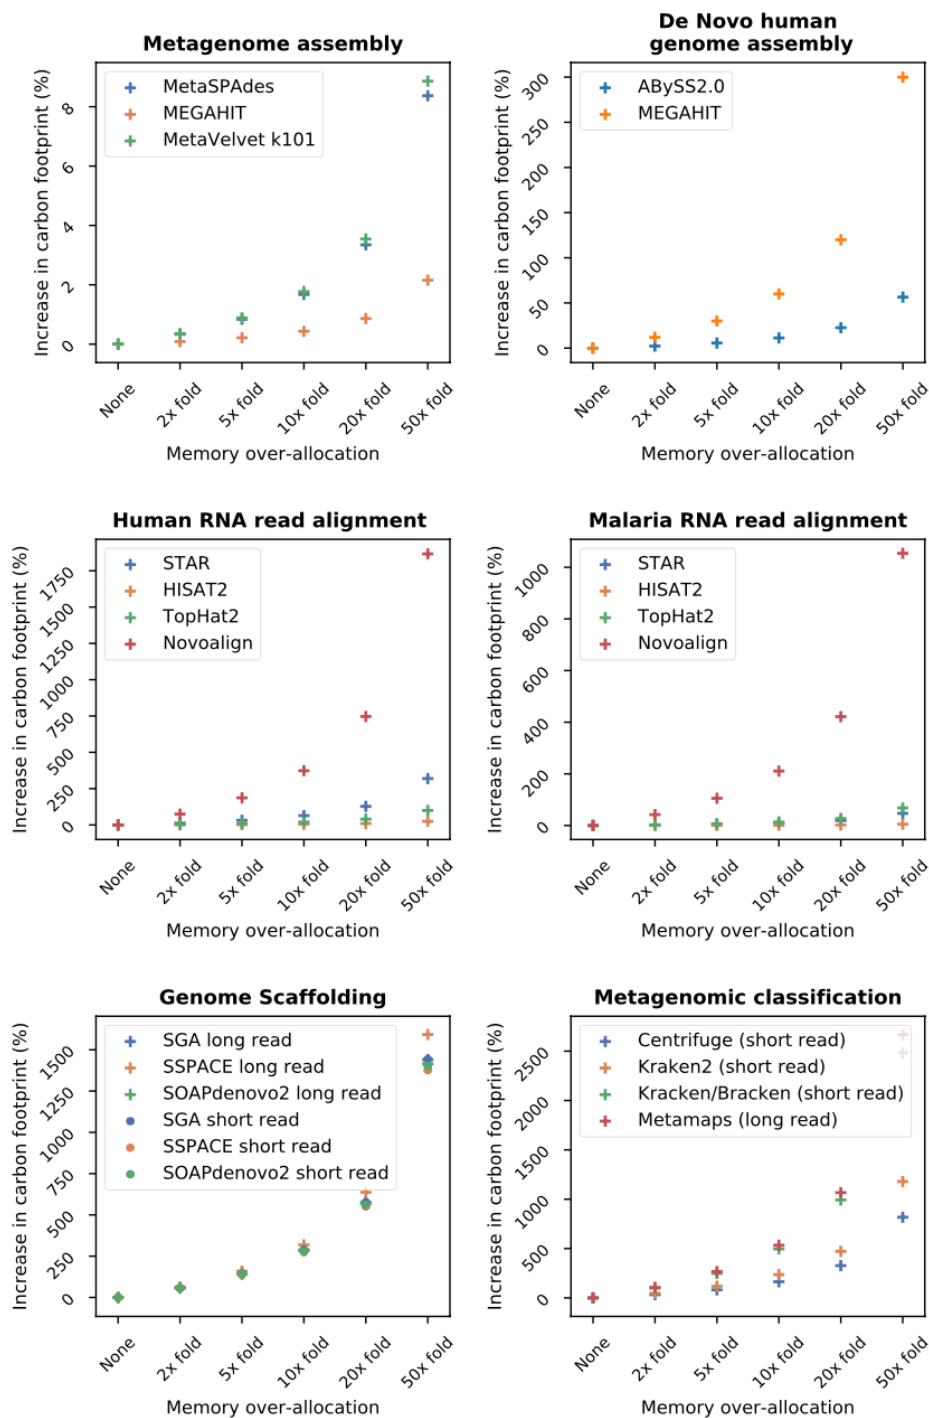

718

719

**Figure 3: Over-allocating memory increases a given algorithm's carbon footprint.**

720

Each plot details the percentage increase in carbon footprint as a function of memory

721

overestimation for a variety of bioinformatic tools and tasks. The numerical data is available

722

in **Supplementary Table 1**.

723

724 **Supplementary materials**

725 **Supplementary table 1:** The percentage increase of carbon footprint as a function of  
726 memory over-allocation for a given algorithm.

| Analysis type                               |                                          | Tool                                         | Percentage increase in carbon footprint as a function of memory over-allocation (%) |         |          |          |          |
|---------------------------------------------|------------------------------------------|----------------------------------------------|-------------------------------------------------------------------------------------|---------|----------|----------|----------|
|                                             |                                          |                                              | 2x fold                                                                             | 5x fold | 10x fold | 20x fold | 50x fold |
| RNA sequencing quality control pipeline     |                                          | FastQC + TrimGalore + clumpify + STARv2.7.0e | 2.50                                                                                | 6.25    | 12.49    | 24.99    | 62.47    |
| <i>De novo</i> assembly of one human genome |                                          | ABySS2.0                                     | 2.26                                                                                | 5.64    | 11.29    | 22.58    | 56.44    |
|                                             |                                          | MEGAHIT                                      | 12.00                                                                               | 29.99   | 59.98    | 119.96   | 299.91   |
| Metagenome assembly from 100 soil samples   |                                          | MetaSPAdes                                   | 0.33                                                                                | 0.84    | 1.67     | 3.35     | 8.37     |
|                                             |                                          | MEGAHIT                                      | 0.09                                                                                | 0.22    | 0.43     | 0.86     | 2.16     |
|                                             |                                          | MetaVelvet k101                              | 0.35                                                                                | 0.89    | 1.77     | 3.54     | 8.86     |
| GWAS on a biobank with 1 trait              |                                          | BOLT-LMM v1                                  | 45.87                                                                               | 114.68  | 229.36   | 458.72   | 1146.81  |
|                                             |                                          | BOLT-LMM v2.3                                | 45.87                                                                               | 114.68  | 229.36   | 458.72   | 1146.80  |
| Read alignment                              | Human ( <i>Homo sapiens</i> hg19)        | STAR v 2.5.0                                 | 12.77                                                                               | 31.92   | 63.84    | 127.69   | 319.22   |
|                                             |                                          | HISAT2 v2.0.0beta                            | 0.98                                                                                | 2.46    | 4.91     | 9.83     | 24.57    |
|                                             |                                          | Tophat v2.1.0                                | 4.00                                                                                | 9.99    | 19.99    | 39.97    | 99.93    |
|                                             |                                          | Novoalign                                    | 74.65                                                                               | 186.63  | 373.25   | 746.51   | 1866.27  |
|                                             | Malaria ( <i>Plasmodium falciparum</i> ) | STAR v 2.5.0                                 | 1.89                                                                                | 4.71    | 9.43     | 18.86    | 47.15    |
|                                             |                                          | HISAT2 v2.0.0beta                            | 0.20                                                                                | 0.51    | 1.02     | 2.04     | 5.10     |
|                                             |                                          | Tophat v2.1.0                                | 2.73                                                                                | 6.82    | 13.64    | 27.29    | 68.22    |
|                                             |                                          | Novoalign                                    | 42.16                                                                               | 105.41  | 210.81   | 421.63   | 1054.07  |
| Phylogenetics                               | Codon modelling                          | BEAST/ BEAGLE                                | 8.30                                                                                | 20.75   | 41.49    | 82.98    | 207.45   |
|                                             | Nucleotide modelling                     |                                              | 15.55                                                                               | 38.87   | 77.74    | 155.47   | 388.68   |
|                                             | Phylogeographic modelling                |                                              | 15.54                                                                               | 38.86   | 77.72    | 155.44   | 388.61   |



|                                         |                             |        |        |        |         |         |
|-----------------------------------------|-----------------------------|--------|--------|--------|---------|---------|
| Long read genome Scaffolding            | SGA                         | 57.61  | 144.03 | 288.05 | 576.10  | 1440.26 |
|                                         | SSPACE                      | 63.70  | 159.24 | 318.49 | 636.97  | 1592.44 |
|                                         | SOAPdenovo2                 | 56.62  | 141.55 | 283.10 | 566.20  | 1415.50 |
| Short read genome scaffolding           | SGA                         | 57.73  | 144.32 | 288.64 | 577.29  | 1443.22 |
|                                         | SSPACE                      | 55.05  | 137.62 | 275.24 | 550.47  | 1376.18 |
|                                         | SOAPdenovo2                 | 56.03  | 140.08 | 280.15 | 560.30  | 1400.76 |
| Transcript isoform abundance estimation | RSEM                        | 26.15  | 65.39  | 130.77 | 261.54  | 653.86  |
|                                         | Sailfish                    | 21.41  | 53.52  | 107.04 | 214.07  | 535.18  |
|                                         | Cufflinks                   | 30.48  | 76.20  | 152.40 | 304.79  | 761.98  |
| Metagenomic classification              | Centrifuge - short read     | 32.69  | 81.73  | 163.46 | 326.91  | 817.28  |
|                                         | Kraken2 - short read        | 47.16  | 117.90 | 235.80 | 471.61  | 1179.02 |
|                                         | Kraken/Bracken - short read | 99.25  | 248.12 | 496.24 | 992.47  | 2481.18 |
|                                         | MetaMaps - long read        | 106.65 | 266.62 | 533.24 | 1066.48 | 2666.19 |

727

728 **Supplementary table 2:** The carbon footprint of hardware changes and parallelisation,  
 729 using benchmarks from Beale et al [32].

| <b>Task</b>                              | <b>Algorithm</b> | <b>Number of CPU cores or GPU devices</b> | <b>Running time (hours)</b> | <b>Carbon footprint (kgCO<sub>2</sub>e)</b> |
|------------------------------------------|------------------|-------------------------------------------|-----------------------------|---------------------------------------------|
| <b>Codon substitution modelling</b>      | BEAST/<br>BEAGLE | 1                                         | 7.75                        | 0.066                                       |
|                                          |                  | 2                                         | 4.17                        | 0.069                                       |
|                                          |                  | 4                                         | 2.42                        | 0.078                                       |
|                                          |                  | 6                                         | 1.72                        | 0.083                                       |
|                                          |                  | 8                                         | 1.42                        | 0.091                                       |
|                                          |                  | 10                                        | 1.25                        | 0.10                                        |
|                                          |                  | 12                                        | 1.08                        | 0.10                                        |
|                                          |                  | 1 GPU<br>2 GPU                            | 0.08<br>0.06                | 0.017<br>0.023                              |
| <b>Nucleotide substitution modelling</b> | BEAST/<br>BEAGLE | 2                                         | 0.67                        | 0.012                                       |
|                                          |                  | 4                                         | 0.43                        | 0.015                                       |
|                                          |                  | 6                                         | 0.40                        | 0.020                                       |
|                                          |                  | 8                                         | 0.39                        | 0.026                                       |
|                                          |                  | 10                                        | 0.43                        | 0.035                                       |
|                                          |                  | 12                                        | 0.43                        | 0.042                                       |
|                                          |                  | 1 GPU<br>2 GPU                            | 0.27<br>0.19                | 0.054<br>0.076                              |
|                                          |                  | <b>Phylogeographic modelling</b>          | BEAST/<br>BEAGLE            | 2                                           |
| 4                                        | 3.73             |                                           |                             | 0.13                                        |
| 6                                        | 3.69             |                                           |                             | 0.18                                        |
| 8                                        | 3.71             |                                           |                             | 0.24                                        |
| 10                                       | 3.68             |                                           |                             | 0.30                                        |
| 1 GPU<br>2 GPU                           | 0.64<br>0.54     |                                           |                             | 0.13<br>0.22                                |

730

731 **Supplementary Note 1:**

732

733 **Estimating the running time at which a GPU has a lower carbon footprint:**

734

735 From rearranging the Green Algorithms carbon footprint formula it can be shown that the  
736 running time at which GPU has a lower carbon footprint is:

737 
$$t_{GPU,eq} = t_{CPU} \times \left( \frac{n_{CPU} \times P_{CPU} \times U_{CPU} + n_{mem,CPU} \times P_{mem}}{n_{GPU} \times P_{GPU} \times U_{GPU} + n_{mem,GPU} \times P_{mem}} \right) \quad (1)$$

738

739 Where,  $n_{CPU}$  is the number of CPU cores,  $n_{GPU}$  is the number of GPUs,  $P_{CPU}$  is the power  
740 drawn by the CPU cores.  $P_{GPU}$  is the power drawn by the GPU.  $U_{CPU}$  is the core usage factor  
741 for the CPU.  $U_{GPU}$  is the usage factor of the GPU.  $n_{mem,CPU}$  is the amount of memory (GB)  
742 utilised when running the CPU,  $n_{mem,GPU}$  is the amount of memory (GB) utilised when  
743 running the GPU.  $P_{mem}$  is the power draw for memory.  $t_{GPU,eq}$  is the running time when the  
744 GPU would have the same carbon footprint as the CPU, and  $t_{CPU}$  is the running time of the  
745 CPU. If the GPU implementation is to have a lower carbon footprint, it must finish within the  
746 time  $t_{GPU,eq}$ .

747

748 When ignoring memory and utilising 1 CPU and 1 GPU with identical core usage factors, this  
749 simplifies to:

$$t_{GPU} = t_{CPU} \times \left( \frac{P_{CPU}}{P_{GPU}} \right) \quad (2)$$

750 Where,  $t_{CPU}$  is scaled by the ratio of the power required to utilise the CPU to the GPU.

751 **Descriptions of additional files:**

752

753 **Additional file 1:** Hardware details for each analysis presented in this manuscript.

754 **Additional file 2:** The ratio of RNA reads per million and ratio of CPU time of 10 random in-

755 house PBMC samples, from the RNA sequencing quality control pipeline task.
